# Supplementary material for: In situ localization of epidermal stem cells using a novel multi epitope ligand cartography approach
Source: Royal Society of Chemistry journal article supplement (doi:10.1039/b926147h), 2010-01-01
Supplement: b926147h.pdf [file b926147h.pdf]

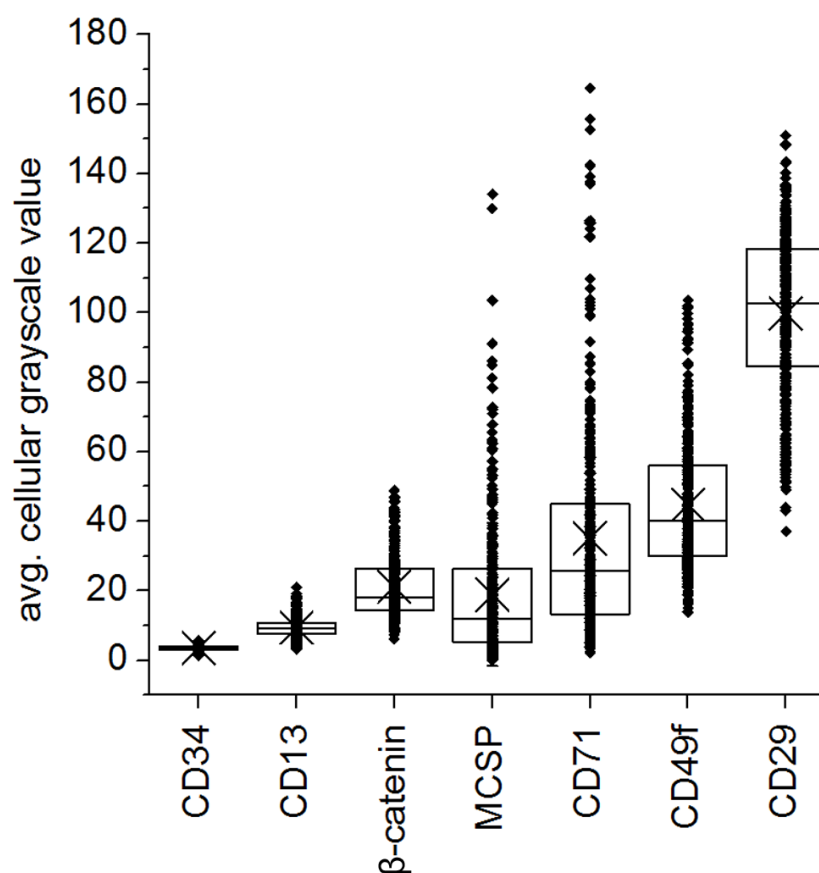

### Supplementary figure 1

Variation of immunofluorescent staining intensities at the membrane of basal keratinocytes. Membranes of basal keratinocytes were manually marked and the average grayscale value was measured on the indicated MELC pictures (x-axis). Each dot represents a single cell, the cross indicates the average of all cells and the box represents the upper and lower 25% quantile. As the variation in staining intensities of CD34, CD13 and membrane β-catenin is very low, these markers were excluded from subsequent analyses.

|                            |       |     |        |      |       |           |        |      |        |       |
|----------------------------|-------|-----|--------|------|-------|-----------|--------|------|--------|-------|
| 20f<br>absolute<br>[pixel] | black | red | violet | blue | brown | turquoise | orange | pink | yellow | green |
| black                      | 22    | 32  | 197    | 191  | 100   | 38        | 216    | 193  | 191    | 179   |
| red                        | 67    | 81  | 134    | 118  | 96    | 84        | 132    | 157  | 147    | 144   |
| violet                     | 376   | 386 | 39     | 39   | 142   | 343       | 76     | 26   | 57     | 36    |
| blue                       | 214   | 228 | 28     | 38   | 68    | 209       | 35     | 26   | 46     | 29    |
| brown                      | 121   | 163 | 109    | 137  | 76    | 133       | 97     | 91   | 119    | 90    |
| turquoise                  | 35    | 47  | 126    | 115  | 80    | 51        | 104    | 130  | 119    | 154   |
| orange                     | 198   | 201 | 38     | 41   | 91    | 191       | 36     | 34   | 76     | 31    |
| pink                       | 558   | 539 | 105    | 106  | 248   | 523       | 156    | 59   | 151    | 90    |
| yellow                     | 271   | 325 | 58     | 65   | 132   | 250       | 100    | 86   | 46     | 84    |
| green                      | 362   | 371 | 44     | 58   | 135   | 329       | 74     | 40   | 72     | 47    |

  

|                            |       |     |        |      |       |           |        |      |        |       |
|----------------------------|-------|-----|--------|------|-------|-----------|--------|------|--------|-------|
| 27f<br>absolute<br>[pixel] | black | red | violet | blue | brown | turquoise | orange | pink | yellow | green |
| black                      | 34    | 29  | 54     | 59   | 103   | 34        | 64     | 78   | 98     | 55    |
| red                        | 57    | 37  | 130    | 124  | 69    | 66        | 92     | 137  | 140    | 157   |
| violet                     | 170   | 142 | 138    | 87   | 193   | 146       | 103    | 88   | 123    | 103   |
| blue                       | 114   | 81  | 41     | 28   | 54    | 107       | 44     | 86   | 41     | 40    |
| brown                      | 732   | 445 | 483    | 323  | 402   | 623       | 408    | 502  | 193    | 419   |
| turquoise                  | 37    | 33  | 56     | 74   | 55    | 47        | 63     | 58   | 84     | 69    |
| orange                     | 68    | 62  | 33     | 41   | 27    | 58        | 30     | 58   | 47     | 49    |
| pink                       | 168   | 178 | 108    | 121  | 47    | 162       | 118    | 40   | 101    | 66    |
| yellow                     | 439   | 305 | 228    | 150  | 39    | 376       | 193    | 219  | 46     | 158   |
| green                      | 165   | 182 | 76     | 86   | 71    | 166       | 85     | 45   | 40     | 45    |

  

|                            |       |     |        |      |       |           |        |      |        |       |
|----------------------------|-------|-----|--------|------|-------|-----------|--------|------|--------|-------|
| 30f<br>absolute<br>[pixel] | black | red | violet | blue | brown | turquoise | orange | pink | yellow | green |
| black                      | 34    | 93  | 193    | 123  | 112   | 76        | 98     | 189  | 152    | 152   |
| red                        | 63    | 91  | 72     | 64   | 68    | 68        | 74     | 40   | 72     | 66    |
| violet                     | 207   | 80  | 33     | 78   | 127   | 178       | 119    | 76   | 63     | 78    |
| blue                       | 59    | 33  | 27     | 24   | 58    | 66        | 39     | 18   | 35     | 24    |
| brown                      | 95    | 75  | 124    | 94   | 147   | 67        | 101    | 46   | 131    | 97    |
| turquoise                  | 31    | 34  | 57     | 49   | 27    | 34        | 43     | 16   | 59     | 35    |
| orange                     | 374   | 223 | 109    | 144  | 237   | 345       | 180    | 126  | 171    | 67    |
| pink                       | 359   | 180 | 146    | 173  | 190   | 249       | 204    | 126  | 185    | 108   |
| yellow                     | 149   | 121 | 70     | 92   | 120   | 110       | 112    | 80   | 37     | 83    |
| green                      | 318   | 168 | 84     | 108  | 183   | 267       | 134    | 67   | 141    | 39    |

  

|                            |       |     |        |      |       |           |        |      |        |       |
|----------------------------|-------|-----|--------|------|-------|-----------|--------|------|--------|-------|
| 60f<br>absolute<br>[pixel] | black | red | violet | blue | brown | turquoise | orange | pink | yellow | green |
| black                      | 29    | 186 | 134    | 177  | 198   | 225       | 185    | 246  | 177    | 206   |
| red                        | 61    | 68  | 100    | 96   | 260   | 129       | 100    | 123  | 39     | 135   |
| violet                     | 293   | 195 | 103    | 76   | 68    | 62        | 78     | 60   | 64     | 63    |
| blue                       | 250   | 139 | 22     | 39   | 51    | 40        | 41     | 43   | 24     | 38    |
| brown                      | 1047  | 736 | 644    | 543  | 0     | 295       | 520    | 299  | 573    | 292   |
| turquoise                  | 53    | 98  | 112    | 93   | 319   | 160       | 91     | 130  | 165    | 186   |
| orange                     | 182   | 117 | 32     | 26   | 26    | 27        | 27     | 22   | 37     | 31    |
| pink                       | 339   | 248 | 130    | 123  | 79    | 59        | 123    | 33   | 185    | 83    |
| yellow                     | 435   | 209 | 144    | 142  | 297   | 156       | 151    | 147  | 37     | 164   |
| green                      | 391   | 222 | 77     | 78   | 26    | 58        | 74     | 49   | 92     | 66    |

  

|                            |       |     |        |      |       |           |        |      |        |       |
|----------------------------|-------|-----|--------|------|-------|-----------|--------|------|--------|-------|
| 64f<br>absolute<br>[pixel] | black | red | violet | blue | brown | turquoise | orange | pink | yellow | green |
| black                      | 43    | 34  | 69     | 85   | 65    | 40        | 91     | 48   | 122    | 86    |
| red                        | 31    | 25  | 56     | 83   | 36    | 34        | 101    | 40   | 141    | 88    |
| violet                     | 90    | 75  | 32     | 53   | 30    | 79        | 54     | 68   | 80     | 38    |
| blue                       | 102   | 91  | 60     | 59   | 36    | 111       | 39     | 30   | 55     | 37    |
| brown                      | 416   | 344 | 280    | 227  | 253   | 428       | 254    | 218  | 314    | 221   |
| turquoise                  | 63    | 49  | 71     | 91   | 21    | 35        | 92     | 61   | 129    | 98    |
| orange                     | 77    | 66  | 52     | 21   | 35    | 99        | 23     | 36   | 27     | 22    |
| pink                       | 217   | 176 | 171    | 121  | 89    | 191       | 161    | 142  | 124    | 121   |
| yellow                     | 216   | 236 | 166    | 112  | 162   | 231       | 100    | 122  | 33     | 101   |
| green                      | 141   | 110 | 90     | 50   | 37    | 192       | 58     | 62   | 56     | 42    |

  

|                            |       |     |        |      |       |           |        |      |        |       |
|----------------------------|-------|-----|--------|------|-------|-----------|--------|------|--------|-------|
| 65f<br>absolute<br>[pixel] | black | red | violet | blue | brown | turquoise | orange | pink | yellow | green |
| black                      | 20    | 38  | 90     | 105  | 97    | 70        | 192    | 159  | 110    | 215   |
| red                        | 65    | 100 | 149    | 181  | 70    | 90        | 165    | 201  | 104    | 175   |
| violet                     | 177   | 222 | 38     | 31   | 146   | 159       | 41     | 31   | 76     | 21    |
| blue                       | 173   | 168 | 29     | 29   | 65    | 141       | 30     | 30   | 57     | 35    |
| brown                      | 308   | 220 | 239    | 184  | 115   | 376       | 379    | 328  | 247    | 387   |
| turquoise                  | 25    | 21  | 42     | 46   | 16    | 21        | 25     | 32   | 27     | 33    |
| orange                     | 198   | 218 | 44     | 34   | 116   | 144       | 22     | 23   | 71     | 19    |
| pink                       | 262   | 328 | 47     | 62   | 261   | 220       | 37     | 59   | 133    | 40    |
| yellow                     | 110   | 90  | 50     | 41   | 53    | 108       | 36     | 37   | 52     | 39    |
| green                      | 302   | 313 | 150    | 134  | 207   | 234       | 77     | 90   | 141    | 179   |

  

|                            |       |     |        |      |       |           |        |      |        |       |
|----------------------------|-------|-----|--------|------|-------|-----------|--------|------|--------|-------|
| 69f<br>absolute<br>[pixel] | black | red | violet | blue | brown | turquoise | orange | pink | yellow | green |
| black                      | 31    | 39  | 354    | 247  | 35    | 130       | 273    | 307  | 231    | 320   |
| red                        | 46    | 50  | 290    | 221  | 85    | 114       | 259    | 232  | 211    | 264   |
| violet                     | 258   | 234 | 75     | 89   | 128   | 115       | 79     | 96   | 97     | 93    |
| blue                       | 346   | 349 | 80     | 102  | 72    | 244       | 61     | 122  | 101    | 76    |
| brown                      | 698   | 773 | 594    | 743  | 0     | 675       | 583    | 448  | 417    | 556   |
| turquoise                  | 56    | 36  | 30     | 69   | 143   | 67        | 59     | 88   | 74     | 82    |
| orange                     | 275   | 262 | 51     | 45   | 95    | 133       | 56     | 100  | 83     | 44    |
| pink                       | 449   | 385 | 158    | 232  | 20    | 243       | 173    | 172  | 128    | 123   |
| yellow                     | 184   | 178 | 61     | 78   | 22    | 133       | 58     | 45   | 80     | 56    |
| green                      | 223   | 203 | 31     | 45   | 53    | 88        | 22     | 23   | 58     | 41    |

Supplementary figure 2

Absolute average minimum distances between keratinocytes of different expression profiles.

For all basal cells on skin sections from seven donors, the shortest distance [pixel] to a cell of each of the ten color coded expression profiles was determined. Values were then averaged for all cells of a given population. Long and short distances are indicated by green and red background color respectively

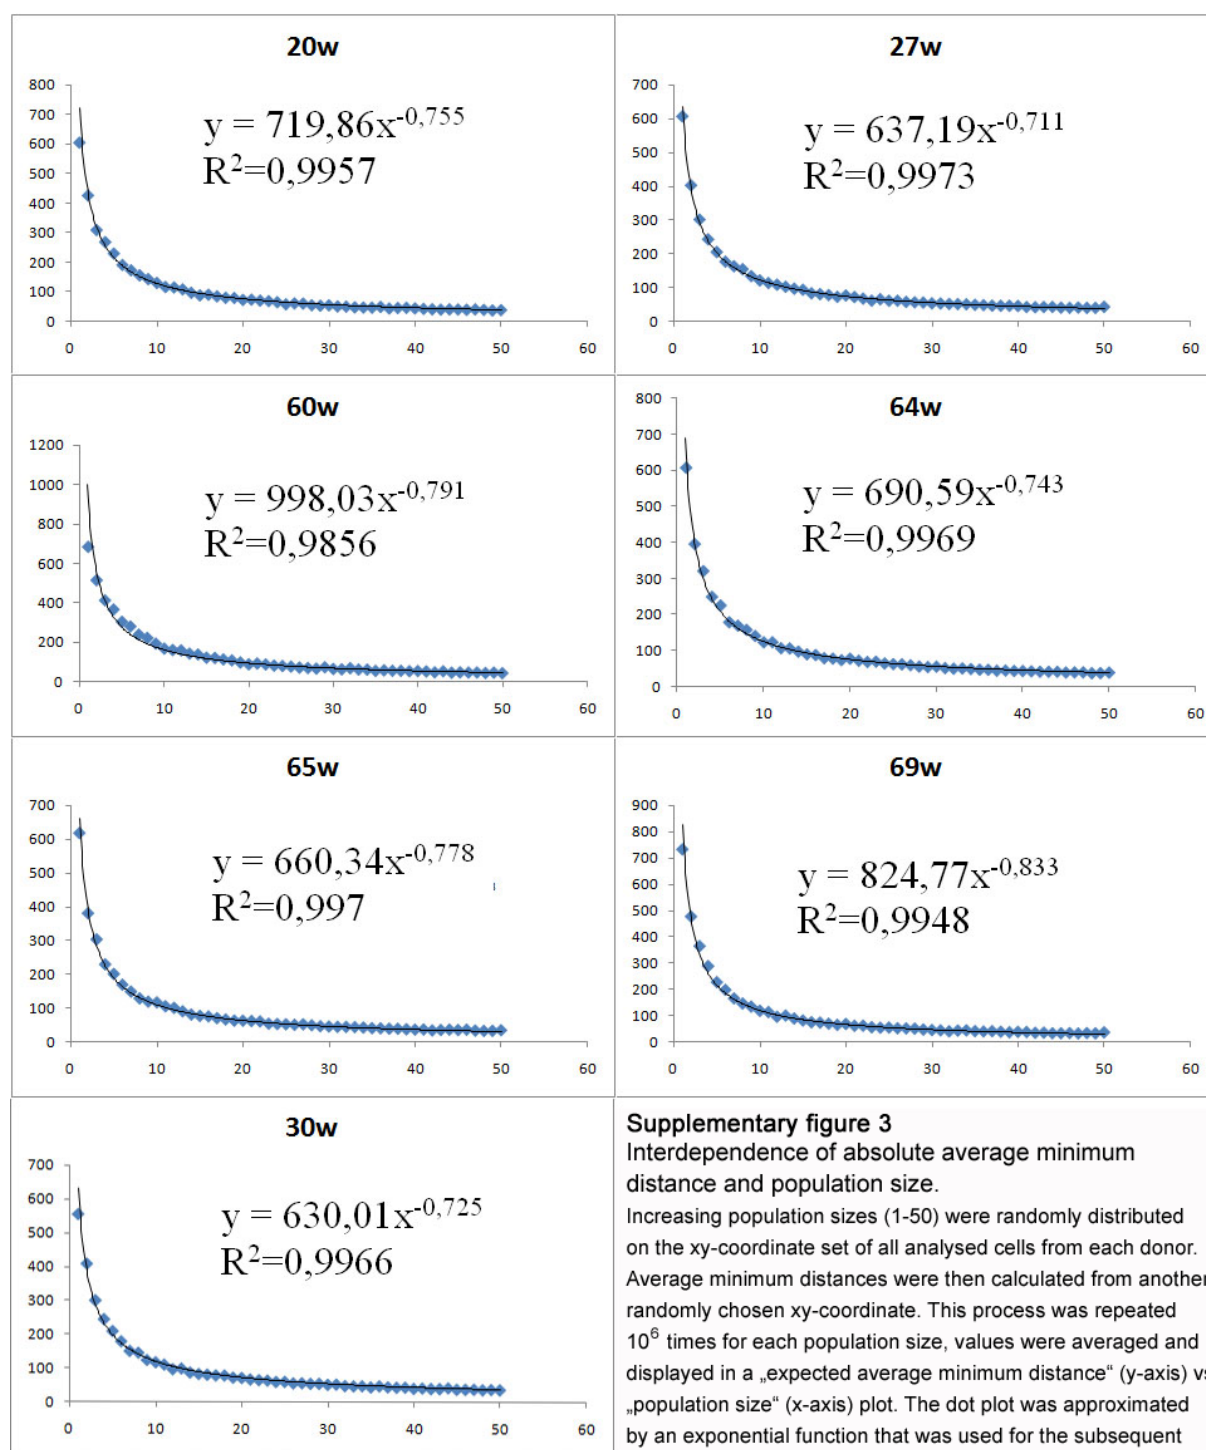



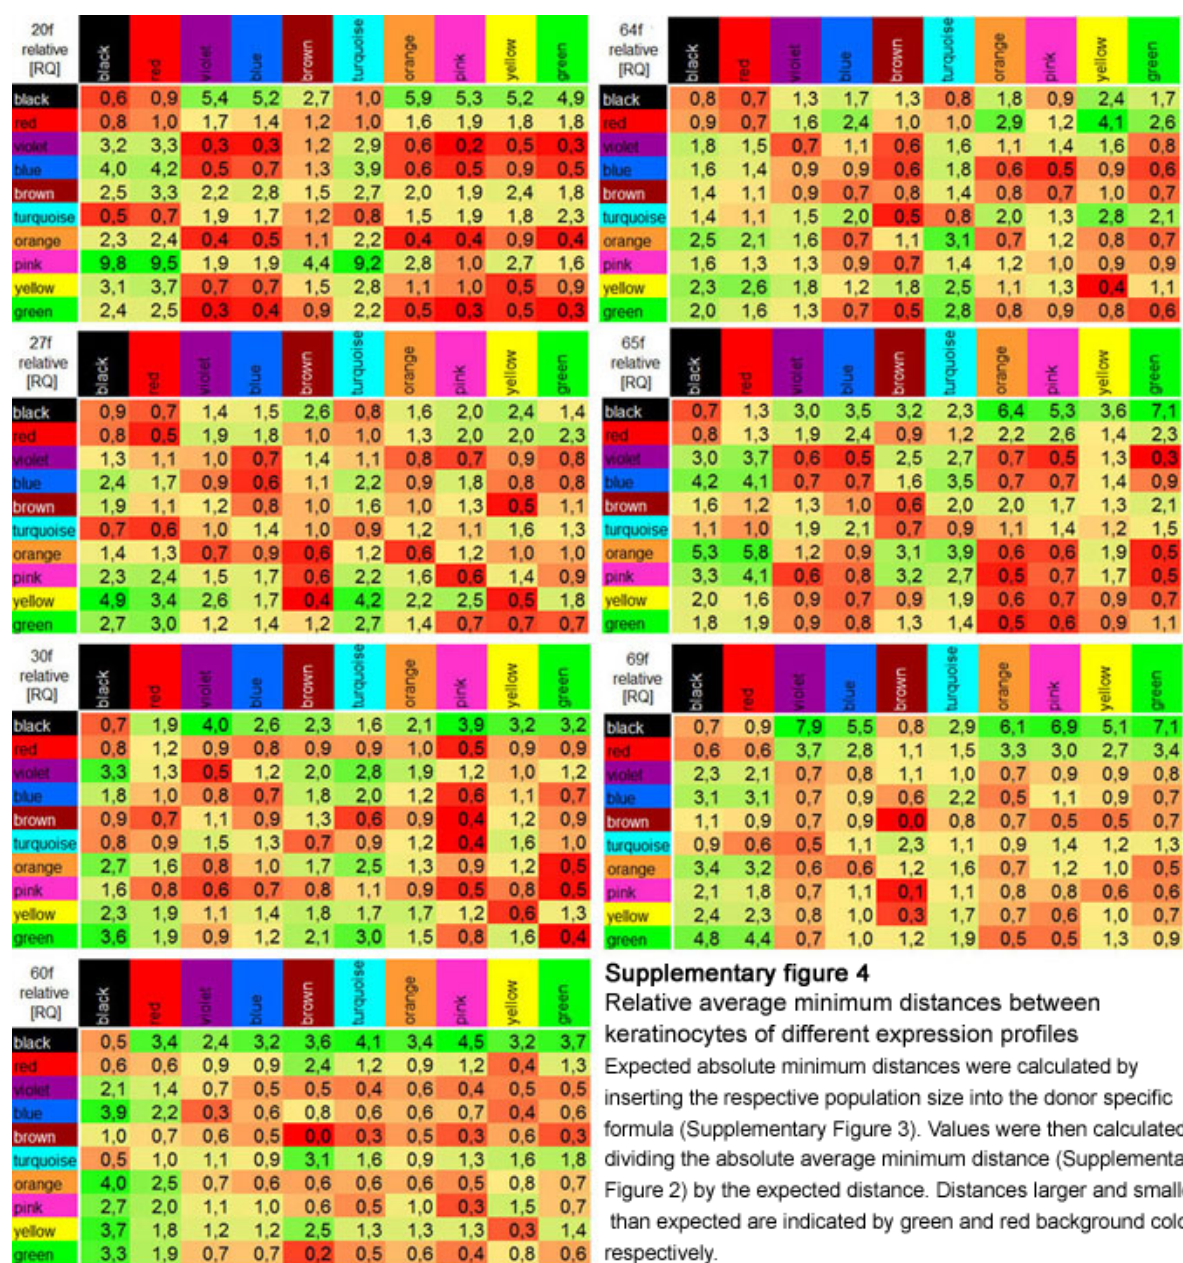

| STD<br>(n=7) | black | red  | violet | blue | brown | turquoise | orange | yellow | pink | green |
|--------------|-------|------|--------|------|-------|-----------|--------|--------|------|-------|
| black        | 0,17  | 0,70 | 0,65   | 0,48 | 0,43  | 0,64      | 0,56   | 0,33   | 0,50 | 0,57  |
| red          | 0,17  | 0,34 | 0,52   | 0,44 | 0,45  | 0,18      | 0,50   | 0,65   | 0,49 | 0,41  |
| violet       | 0,31  | 0,51 | 0,32   | 0,44 | 0,53  | 0,56      | 0,51   | 0,44   | 0,56 | 0,49  |
| blue         | 0,36  | 0,51 | 0,30   | 0,18 | 0,42  | 0,47      | 0,30   | 0,34   | 0,57 | 0,18  |
| brown        | 0,38  | 0,70 | 0,45   | 0,70 | 0,79  | 0,63      | 0,53   | 0,64   | 0,66 | 0,60  |
| turquoise    | 0,37  | 0,23 | 0,37   | 0,29 | 0,72  | 0,28      | 0,30   | 0,32   | 0,36 | 0,30  |
| orange       | 0,41  | 0,56 | 0,47   | 0,28 | 0,66  | 0,52      | 0,39   | 0,35   | 0,41 | 0,35  |
| yellow       | 0,36  | 0,33 | 0,53   | 0,31 | 0,61  | 0,43      | 0,43   | 0,45   | 0,52 | 0,34  |
| pink         | 0,88  | 0,96 | 0,44   | 0,38 | 1,09  | 1,15      | 0,61   | 0,51   | 0,40 | 0,49  |
| green        | 0,35  | 0,40 | 0,41   | 0,39 | 0,57  | 0,43      | 0,53   | 0,41   | 0,37 | 0,41  |

### Supplementary figure 5

Standard deviations of relative average minimum distances of seven donors.

Data were calculated from average minimum distance data of seven donors (Supplementary Figure 4).

Small and large variations are indicated by green and red background color respectively.
